# Supplementary material
Source: PubMed Central journal article supplement (PMC4455747)
Supplement: rsbl20150211supp1.pdf [file rsbl20150211supp1.pdf]

## SUPPLEMENTARY MATERIAL

### *Telomere length assay*

Telomere length was measured in DNA from red-blood cells using quantitative PCR (qPCR) on a StepOnePlus (Applied Biosystems). DNA was extracted by using DNeasy Blood and tissue kit and following the manufacturer's instructions (Qiagen). The quantity and purity of the genomic DNA were measured using Take3 on a Synergy microplate reader spectrophotometer (BioTek). We estimated telomere length as the ratio (T/S) of telomere repeat copy number (T) to single gene copy number (S), relative to a reference (golden) sample [1]. We used glyceraldehyde-3-phosphate dehydrogenase (GAPDH) as the control, single copy gene, with primer sequences designed on PRIMER EXPRESS (Applied Biosystems) from *Larus michahellis* GAPDH gene intron (GenBank: FM209949.1; Forward GGAPDH1: 5'-GGAGGGTGTATGGAATTCTTCCT-3'; Reverse GGAPDH2: 5'-CACAAACCGAACCACTCAGCT-3'). The telomeres were amplified using the following primers forward tel1b (5'-CGTTTGTGGTTTGGTTTGGTTTGGTTTGGTTTGGTT-3') and reverse tel2b (5'-GGCTTGCCTTACCCTTACCCTTACCCTTACCCTTACCCTTACCCT-3'). Melt curve analysis indicated that a single amplicon was generated by qPCR with the designed GAPDH primers as also confirmed in an electrophoresis analyses (figure S1).

For the quantitative PCR assay, we used 10 ng of DNA per reaction and at a concentration of 150 µM. Primers were mixed with 10 µl Luminaris Color HiGreen High ROX qPCR Master Mix (ThermoScientific) for a total volume of 20 µl. Telomere and GAPDH reactions were performed on separate plates, and we added 1 µl of betaine in the telomere reaction. The qPCR conditions for GAPDH were: 10 min at 95°C, followed by 40 cycles of 15 s at 95°C, 30 s at 58°C and 30 s at 72°C; conditions for telomeres were: 10 min at 95°C, followed by 40 cycles of 15 s at 95°C, 34 s at 60°C and 30 s at 72°C.

A pool of three individual samples was used as reference 'golden' sample, which was serially diluted to produce a standard curve (40 ng, 20 ng, 10 ng, 5 ng of

DNA per well) in triplicate on every plate. Our samples always fell within the limits of the standard curves. We ran 20 plates (10 plates for each primer set) and the mean reaction efficiencies were 104.5 (range 95.45–111.0) for telomeres and 103.12 (range 94.5–110.5) for GAPDH. The golden sample was also used to calculate both the within- and among-plate variations. Mean intra-assay variations (CV) of the  $C_q$  values (quantification cycles, [2]) for telomere and GAPDH reactions were 0.7 and 0.3, respectively, and inter-assay variations (CV) were 2.8 and 1.1. Samples were ran in duplicate and we used the mean  $C_q$  values of the duplicates in all calculations ( $C_q$  values, mean  $\pm$  SD; telomere:  $17.76 \pm 0.65$ ; GAPDH:  $21.11 \pm 0.52$ ). Three wells (one in one telomere plate and two in two GAPDH plates) failed to produce positive amplicons. Duplicates were highly repeatable (average intra-class correlation coefficient [95% interval]; telomere: 0.93 [0.90-94],  $p < 0.001$ ; GAPDH: 0.97 [0.96-98],  $p < 0.001$ ,  $n = 220$ ). T/S ratio of each sample was calculated using the mean value as:  $(1+E_{f_{tel}})^{\Delta C_{q\ tel}} / (1+E_{f_{GAPDH}})^{\Delta C_{q\ GAPDH}}$ . Here,  $E_f$  represents the plate efficiency, and  $\Delta C_q$  the difference in  $C_q$ -values between the golden sample and the focal sample.

Since the quantitative PCR assay measures the total number of telomeric repeats [3], our measure of the telomere length (T/S ratio) includes interstitial repeats that do not change with time. A previous study has shown that interstitial repeats were not a significant problem in the estimation of telomere length in a similar gull species (*Larus fuscus*) to our study species [4]. Nevertheless, if there is a large variation in interstitial telomere signal among- and within-individual levels, this may add noise to our telomere length data. However, probably it is unlikely that this variation, if any, confound our results unless interstitial repeats varied between randomly allocated samples to the two experimental treatments.

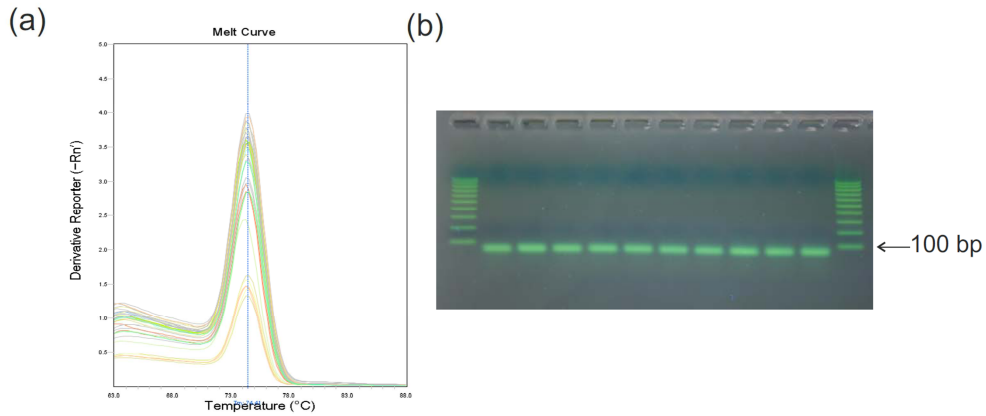

**Figure S1.** Validation of reaction products obtained from the designed gull GAPDH primers. (a) Melt-curve analysis showing the first derivative of the change in fluorescence intensity as a function of temperature. (b) Electrophoresis analyses of the reaction products, which were separated in 2% agarose gel, and visualized with Red Safe Nucleic Acid Staining Solution (Intron Biotechnology). First and last lanes, molecular weight markers 100-1,000 bp in 100 bp increments; the rest (lanes 2-11), single PCR products using the designed gull GAPDH primers corresponding to ten different chicks. This single product was around 69 bp, as confirmed in an additional electrophoresis analysis with a 50bp increment rule. This was the predicted amplicon size based on the alignment of primers of the yellow-legged gull GAPDH gene sequence.

**Table S1.** Summary of the full and final mixed models of tonic immobility, growth rate and telomere length ( $n = 212$  chicks).

| dependent variable               | source of variation                | full model               |          |             |                 | final model    |          |             |                 |
|----------------------------------|------------------------------------|--------------------------|----------|-------------|-----------------|----------------|----------|-------------|-----------------|
|                                  |                                    | estimate (SE)            | <i>F</i> | <i>d.f.</i> | <i>p</i> -value | estimate (SE)  | <i>F</i> | <i>d.f.</i> | <i>p</i> -value |
| tonic immobility                 | intercept                          | -1.70 (5.55)             |          |             |                 | 0.013 (0.17)   |          |             |                 |
|                                  | treatment (control)                | -6.11 (9.21)             | 0.36     | 1,48.96     | 0.552           |                |          |             |                 |
|                                  | sex (male)                         | -0.66 (0.44)             | 0.26     | 1,200       | 0.614           |                |          |             |                 |
|                                  | hatching date                      | 0.19 (0.13)              | 0.12     | 1,44.34     | 0.726           |                |          |             |                 |
|                                  | hatching order (A)                 | 0.23 (0.60)              | 1.60     | 2,200       | 0.205           |                |          |             |                 |
|                                  | hatching order (B)                 | 0.56 (0.57)              |          |             |                 |                |          |             |                 |
|                                  | egg volume                         | 0.00003 (0.00004)        | 1.62     | 1,156.6     | 0.205           |                |          |             |                 |
|                                  | treatment x sex                    | 0.95 (0.63)              | 2.22     | 1,200       | 0.132           |                |          |             |                 |
|                                  | treatment x hatching date          | 0.12 (0.28)              | 0.17     | 1,44.34     | 0.679           |                |          |             |                 |
|                                  | treatment x hatching order (A)     | 0.32 (0.91)              | 0.09     | 2,200       | 0.911           |                |          |             |                 |
|                                  | treatment x hatching order (B)     | 0.37 (0.86)              |          |             |                 |                |          |             |                 |
|                                  | treatment x egg volume             | 0.00002 (0.00006)        | 0.12     | 1,156.6     | 0.731           |                |          |             |                 |
|                                  | random factors <sup>1</sup>        |                          |          |             |                 |                |          |             |                 |
|                                  | original nest (cross-foster group) |                          |          |             |                 | 0.13 (0.31)    |          |             | 0.655           |
| foster nest (cross-foster group) |                                    |                          |          |             | 0               |                |          | 1.0         |                 |
| cross-foster group               |                                    |                          |          |             | 0.25 (0.23)     |                |          | 0.195       |                 |
| growth rate                      | Intercept                          | 0.26 (0.09)              |          |             |                 | 0.33 (0.052)   |          |             |                 |
|                                  | treatment (control)                | -0.0016 (0.16)           | 0.02     | 1,130       | 0.900           |                |          |             |                 |
|                                  | sex (male)                         | -0.0087 (0.0094)         | 0.13     | 1,155       | 0.723           |                |          |             |                 |
|                                  | hatching date                      | -0.0073 (0.0026)         | 8.49     | 1,124       | 0.004           | -0.008 (0.002) | 20.91    | 1,202       | <0.001          |
|                                  | hatching order (A)                 | -0.0087 (0.0094)         | 1.81     | 2,115       | 0.169           |                |          |             |                 |
|                                  | hatching order (B)                 | -0.0005 (0.0087)         |          |             |                 |                |          |             |                 |
|                                  | egg volume                         | $5.84 \cdot 10^{-7}$ (0) | 0.64     | 1,111       | 0.424           |                |          |             |                 |
|                                  | treatment x sex                    | 0.010 (0.0097)           | 1.10     | 1,155       | 0.297           |                |          |             |                 |
|                                  | treatment x hatching date          | 0.00073 (0.0047)         | 0.88     | 1,124       | 0.605           |                |          |             |                 |
| treatment x hatching order (A)   | 0.025 (0.014)                      | 1.83                     | 2,115    | 0.164       |                 |                |          |             |                 |

|                 |                                    |                                 |      |       |       |                            |      |       |        |
|-----------------|------------------------------------|---------------------------------|------|-------|-------|----------------------------|------|-------|--------|
|                 | treatment x hatching order (B)     | 0.022 (0.13)                    |      |       |       |                            |      |       |        |
|                 | treatment x egg volume             | -4.59·10 <sup>-7</sup> (0)      | 0.25 | 1,111 | 0.606 |                            |      |       |        |
|                 | random factors <sup>1</sup>        |                                 |      |       |       |                            |      |       |        |
|                 | original nest (cross-foster group) |                                 |      |       |       | 1.56·10 <sup>-21</sup> (0) |      |       | 1.0    |
|                 | foster nest (cross-foster group)   |                                 |      |       |       | 0.007 (0.0002)             |      |       | <0.001 |
|                 | cross-foster group                 |                                 |      |       |       | 0                          |      |       | 1.0    |
| telomere length | intercept                          | 0.87 (1.57)                     |      |       |       | 1.41 (0.14)                |      |       |        |
|                 | treatment (control)                | 1.63 (2.42)                     | 0.50 | 1,196 | 0.480 | -0.23 (0.14)               | 0.09 | 1,206 | 0.758  |
|                 | tonic immobility (bold)            | -0.0099 (0.26)                  | 0.44 | 1,196 | 0.510 | -0.0099 (0.13)             | 4.01 | 1,206 | 0.047  |
|                 | growth                             | 2.75 (1.81)                     | 5.20 | 1,196 | 0.024 | 2.66 (1.15)                | 5.33 | 1,206 | 0.022  |
|                 | sex (male)                         | 0.086 (0.14)                    | 4.42 | 1,196 | 0.037 | 0.190 (0.095)              | 3.94 | 1,206 | 0.048  |
|                 | hatching date                      | 0.016 (0.041)                   | 0.45 | 1,196 | 0.502 |                            |      |       |        |
|                 | hatching order (A)                 | 0.14 (0.19)                     | 1.12 | 2,196 | 0.327 |                            |      |       |        |
|                 | hatching order (B)                 | 0.085 (0.18)                    |      | 1,196 |       |                            |      |       |        |
|                 | egg volume                         | 2.91·10 <sup>-7</sup> (0.00001) | 0.29 | 1,196 | 0.590 |                            |      |       |        |
|                 | treatment x tonic immobility       | 0.35 (0.20)                     | 3.17 | 1,196 | 0.076 | 0.40 (0.19)                | 4.41 | 1,206 | 0.037  |
|                 | treatment x growth                 | 0.18 (2.39)                     | 0.01 | 1,196 | 0.941 |                            |      |       |        |
|                 | treatment x sex                    | 0.24 (0.20)                     | 1.53 | 1,196 | 0.217 |                            |      |       |        |
|                 | treatment x hatching date          | -0.084 (0.073)                  | 1.31 | 1,196 | 0.253 |                            |      |       |        |
|                 | treatment x hatching order (A)     | -0.28 (0.28)                    | 1.57 | 2,196 | 0.211 |                            |      |       |        |
|                 | treatment x hatching order (B)     | -0.48 (0.27)                    |      | 1,196 |       |                            |      |       |        |
|                 | treatment x egg volume             | 8.47·10 <sup>-6</sup> (0.00001) | 0.25 | 1,196 | 0.617 |                            |      |       |        |
|                 | random factors <sup>1</sup>        |                                 |      |       |       |                            |      |       |        |
|                 | original nest (cross-foster group) |                                 |      |       |       | 0                          |      |       | 1.0    |
|                 | foster nest (cross-foster group)   |                                 |      |       |       | 0                          |      |       | 1.0    |
|                 | cross-foster group                 |                                 |      |       |       | 4.92·10 <sup>-20</sup>     |      |       | 1.0    |

<sup>1</sup>p-values of random effects were estimated in the final models by the likelihood ratio test

## References

1. Cawthon RM. 2002 Telomere measurement by quantitative PCR. *Nucleic Acids Res.* **30**, e47-e47.
2. Bustin SA, Benes V, Garson JA, Hellemans J, Huggett J, Kubista M, Mueller R, Nolan T, Pfaffl MW, Shipley GL, Vandesompele J, Wittwer CT. 2009 The MIQE guidelines: minimum information for publication of quantitative real-time PCR experiments. *Clin. Chem.* **55**, 611-622.
3. Nakagawa S, Gemmell NJ, Burke T. 2004 Measuring telomeres: applications and limitations. *Mol. Ecol.* **13**, 2523–2533.
4. Foote CG, Gault EA, Nasir L, Monaghan P. 2011 Telomere dynamics in relation to early growth conditions in the wild in the lesser black-backed gull. *J. Zool.* **283**, 203–209.
